# Supplementary material for: Study of Prescription-Indication of Outpatient Systemic Anti-Fungals in a Colombian Population. A Cross-Sectional Study
Source: MDPI journal article supplement (doi:10.3390/antibiotics11121805), 2022-12-13
Supplement: s1 [file s1]

## Supplementary Tables

**Supplementary Table S1.** Approved uses of systemic antifungals.

| Antifungal           | Approved use                                                                                                                                                                                                                                                                                                                                                                                                                                                                                  |
|----------------------|-----------------------------------------------------------------------------------------------------------------------------------------------------------------------------------------------------------------------------------------------------------------------------------------------------------------------------------------------------------------------------------------------------------------------------------------------------------------------------------------------|
| <b>Flucytosine</b>   | <i>Deep:</i> Candidiasis (candidemia, endocarditis, urinary tract, pulmonary, endophthalmitis, central nervous system), cryptococcosis (meningeal, pulmonary)                                                                                                                                                                                                                                                                                                                                 |
| <b>Fluconazole</b>   | <i>Deep:</i> Candidiasis (invasive, candidemia, central nervous system, esophageal, oropharyngeal, endophthalmitis, endocarditis, urinary tract, arthritis), cryptococcosis (meningeal, pulmonary), histoplasmosis (disseminated, central nervous system, pulmonary), coccidioidomycosis, blastomycosis, lymphocutaneous sporotrichosis, trichophytosis, cutaneous leishmaniasis<br><i>Superficial:</i> Vulvovaginal candidiasis, dermatophyte onychomycosis, pityriasis versicolor, ringworm |
| <b>Griseofulvin</b>  | <i>Superficial:</i> Vulvovaginal candidiasis, dermatophyte onychomycosis, ringworm                                                                                                                                                                                                                                                                                                                                                                                                            |
| <b>Isavuconazole</b> | <i>Deep:</i> invasive aspergillosis, invasive mucormycosis                                                                                                                                                                                                                                                                                                                                                                                                                                    |
| <b>Itraconazole</b>  | <i>Deep:</i> Aspergillosis (bronchopulmonary, invasive, pulmonary), candidiasis (invasive, candidemia, esophageal, oropharyngeal), meningeal cryptococcosis, histoplasmosis (disseminated, central nervous system, pulmonary), coccidioidomycosis, paracoccidioidomycosis, blastomycosis, sporotrichosis, systemic chromomycosis.<br><i>Superficial:</i> Vulvovaginal candidiasis, dermatophyte onychomycosis, pityriasis versicolor, ringworm                                                |
| <b>Ketoconazole</b>  | Severe deep infections when other safer drugs are not available or are not tolerated                                                                                                                                                                                                                                                                                                                                                                                                          |
| <b>Nystatin</b>      | <i>Superficial:</i> Candidiasis (vulvovaginal, cutaneous, mucocutaneous, oropharyngeal, gastrointestinal -not esophageal-)                                                                                                                                                                                                                                                                                                                                                                    |
| <b>Posaconazole</b>  | <i>Deep:</i> Aspergillosis (bronchopulmonary, invasive, pulmonary), candidiasis (invasive, candidemia, esophageal, oropharyngeal).                                                                                                                                                                                                                                                                                                                                                            |
| <b>Terbinafine</b>   | <i>Superficial:</i> Dermatophyte onychomycosis, dermatophytosis (tinea corporis, cruris, pedis, capitis), pityriasis versicolor, seborrheic dermatitis, sporotrichosis (cutaneous, lymphocutaneous), cutaneous chromoblastomycosis                                                                                                                                                                                                                                                            |
| <b>Voriconazole</b>  | <i>Deep:</i> Aspergillosis (bronchopulmonary, invasive, pulmonary), candidiasis (invasive, candidemia, esophageal, oropharyngeal, endophthalmitis), blastomycosis, fusariosis, scedosporiosis.                                                                                                                                                                                                                                                                                                |

**Supplementary Table S2.** Top 15 uses of systemic antifungals from 35,824 patients reporting primary and secondary diagnoses, Colombia.

| Uses                                        | Fluconazole |      | Nystatin |      | Ketoconazole |      | Terbinafine |      | Itraconazole |      | Fluconazole +<br>secnidazole |      | Itraconazole<br>+ secnidazole |      | Voriconazole |      | Posaconazole |      | Isavuconazole |      |
|---------------------------------------------|-------------|------|----------|------|--------------|------|-------------|------|--------------|------|------------------------------|------|-------------------------------|------|--------------|------|--------------|------|---------------|------|
|                                             | n=25340     | %    | n=5272   | %    | n=3949       | %    | n=796       | %    | n=588        | %    | n=102                        | %    | n=48                          | %    | n=38         | %    | n=18         | %    | n=4           | %    |
| Vaginitis - vulvitis –<br>vulvovaginitis    | 12092       | 47.7 | 274      | 5.2  | 881          | 22.3 | 29          | 3.6  | 59           | 10.0 | 85                           | 83.3 | 38                            | 79.2 | 1            | 2.6  | 0            | 0.0  | 0             | 0.0  |
| Opportunistic<br>mycoses                    | 2323        | 9.2  | 764      | 14.5 | 262          | 6.6  | 77          | 9.7  | 69           | 11.7 | 4                            | 3.9  | 0                             | 0.0  | 24           | 63.2 | 14           | 77.8 | 3             | 75.0 |
| Onychomycosis                               | 972         | 3.8  | 6        | 0.1  | 54           | 1.4  | 233         | 29.3 | 116          | 19.7 | 0                            | 0.0  | 1                             | 2.1  | 0            | 0.0  | 0            | 0.0  | 0             | 0.0  |
| Pityriasis versicolor                       | 707         | 2.8  | 16       | 0.3  | 435          | 11.0 | 38          | 4.8  | 60           | 10.2 | 0                            | 0.0  | 0                             | 0.0  | 0            | 0.0  | 0            | 0.0  | 0             | 0.0  |
| Superficial mycoses                         | 951         | 3.8  | 33       | 0.6  | 250          | 6.3  | 49          | 6.2  | 23           | 3.9  | 0                            | 0.0  | 0                             | 0.0  | 0            | 0.0  | 0            | 0.0  | 0             | 0.0  |
| Acute<br>nasopharyngitis                    | 275         | 1.1  | 660      | 12.5 | 63           | 1.6  | 3           | 0.4  | 4            | 0.7  | 0                            | 0.0  | 0                             | 0.0  | 0            | 0.0  | 0            | 0.0  | 0             | 0.0  |
| Unspecified<br>mycosis                      | 785         | 3.1  | 44       | 0.8  | 191          | 4.8  | 23          | 2.9  | 29           | 4.9  | 0                            | 0.0  | 0                             | 0.0  | 1            | 2.6  | 0            | 0.0  | 0             | 0.0  |
| Body ringworm                               | 776         | 3.1  | 6        | 0.1  | 208          | 5.3  | 49          | 6.2  | 25           | 4.3  | 0                            | 0.0  | 0                             | 0.0  | 0            | 0.0  | 0            | 0.0  | 0             | 0.0  |
| Urinary infection                           | 779         | 3.1  | 102      | 1.9  | 97           | 2.5  | 5           | 0.6  | 4            | 0.7  | 2                            | 2.0  | 3                             | 6.3  | 0            | 0.0  | 0            | 0.0  | 0             | 0.0  |
| Acute tonsillitis                           | 50          | 0.2  | 725      | 13.8 | 10           | 0.3  | 1           | 0.1  | 0            | 0.0  | 1                            | 1.0  | 0                             | 0.0  | 0            | 0.0  | 0            | 0.0  | 0             | 0.0  |
| Stomatitis                                  | 46          | 0.2  | 742      | 14.1 | 8            | 0.2  | 0           | 0.0  | 0            | 0.0  | 0                            | 0.0  | 0                             | 0.0  | 0            | 0.0  | 0            | 0.0  | 0             | 0.0  |
| Unspecified<br>dermatophytosis              | 506         | 2.0  | 15       | 0.3  | 161          | 4.1  | 24          | 3.0  | 34           | 5.8  | 0                            | 0.0  | 0                             | 0.0  | 0            | 0.0  | 0            | 0.0  | 0             | 0.0  |
| Bacterial or viral<br>intestinal infections | 184         | 0.7  | 208      | 3.9  | 20           | 0.5  | 3           | 0.4  | 1            | 0.2  | 0                            | 0.0  | 0                             | 0.0  | 0            | 0.0  | 0            | 0.0  | 0             | 0.0  |
| Allergic/contact<br>dermatitis              | 285         | 1.1  | 23       | 0.4  | 47           | 1.2  | 15          | 1.9  | 9            | 1.5  | 2                            | 2.0  | 0                             | 0.0  | 0            | 0.0  | 0            | 0.0  | 0             | 0.0  |
| External otitis                             | 252         | 1.0  | 27       | 0.5  | 63           | 1.6  | 1           | 0.1  | 4            | 0.7  | 0                            | 0.0  | 0                             | 0.0  | 0            | 0.0  | 0            | 0.0  | 0             | 0.0  |
